# Supplementary material
Source: publisher site journal article supplement (https://www.spandidos-publications.com/2876/downloadSupplementary)
Supplement: Supplementary file 1 [file downloadSupplementary]

## Sheet: Supplementary Table 1
	Table SI. List of UniProt accession of reviewed protein in Table I.
		UniProt Accession (References in Table I)
	(Ref.)	37	71	72	79	50	15	75	74	78	31	24
	No. of reviewed protein (UniProt)	47	468	13	11	78	798	709	704	1337	71	994
	1	P02788	P31025	P01009	P02768	P02788	Q8IZ83	P12273	P02788	Q9C0C9	P02788	P02788
	2	Q99935	P02788	P01876	P31025	P31025	P19652	P02788	P02768	P54922	P01833	P01833
	3	P02768	P01036	P60709	P12273	P79179	P01009	P02768	P31025	Q9BV57	P02768	P31025
	4	P01876	O75556	P00738	P61626	P12273	P08697	P61626	P01024	Q04446	E7EW31	P98160
	5	P01877	P12273	Q5VSP4	P01037	P01036	P02750	P31025	P25311	Q9NRX4	P01876	P01024
	6	P01766	P01834	P12273	O75556	Q9GZZ8	P01023	O75556	P01833	P31946	P25311	P61626
	7	P0CG04	P04114	P02766	P25311	P01876	P01011	P01833	P02787	P62258	P31025	P02768
	8	P01834	Q16378	P25311	P01967	P00761	Q9H7C9	P01036	P06733	Q04917	Q16378	P01876
	9	Q16378	P01037	Q9GZZ8	P14639	O75556	P17174	P06733	P00352	P61981	P00738	P25311
	10	P31025	P98160	P02788	P37712	P25311	P00505	P01591	P01023	P31947	Q9GZZ8	P04264
	11	P12273	P01024	P02647	P01945	P01834	P31941	P01024	P14618	P27348	P01036	P13645
	12	P14555	P61626	P61626		Q16378	P21399	P98160	P01009	P63104	P35527	P10909
	13	P01037	P04083	P31025		O95968	Q562R1	Q9GZZ8	P98160	Q9C0C2	P12273	Q9GZZ8
	14	P61626	Q9GZZ8			P01833	O43707	Q16378	O43707	Q99460	P02533	Q16378
	15	P01036	P02787			B9A064	P00326	P01009	P0DMV8	O75832	P35908	P19013
	16	O75556	P0CG04			Q99935	P40394	Q09666	P0DMV9	O00231	P61626	Q9UGM3
	17	P01833	P25311			P02768	P11766	P63104	P04083	O00232	P01037	P35527
	18	P09228	P02768			P0CG06	Q15847	P10909	P12273	Q9UNM6	O75556	P0DOX7
	19	Q9GZZ8	P01591			P79847	P55263	Q9UGM3	P30740	O00487	O95968	P01036
	20	O95968	P01877			P01877	Q9Y6U3	P04792	P04264	Q13200	P01011	P13647
	21	P01591	P63256			Q9UGM3	P43652	P14618	P01876	O43242	P06312	Q13421
	22	P28325	P63257			Q13421	P06280	Q13421	P07355	P55036	P01871	P01591
	23	P01034	P63260			Q96DA0	O95994	P09211	P61626	Q16401	Q9UGM3	P00450
	24	P61769	P63258			P79806	Q09666	P04083	P07900	Q15008	P04083	P02787
	25	O60242	P63259			Q5R9B3	P14550	P01023	P21980	P51665	P00338	P13646
	26	Q9ULA0	P01023			P01591	Q04828	O43707	Q16378	P62333	P07355	P12273
	27	Q99954	P08622			A8FX83	P52895	Q3B7S5	Q13228	P17980	P0DMV9	P35908
	28	P03973	Q99935			P00738	P00352	P35579	P63261	P43686	P60174	O75556
	29	Q12849	P02647			Q8VEL2	P47895	P00352	Q9GZZ8	P35998	P01704	P01871
	30	P54646	P30740			P61771	P49419	P00558	P00450	P62195	P47895	O95968
	31	P01742	P10909			P03973	P02768	P11142	P01857	O95861	P04792	P02533
	32	P01743	P00450			P10909	P02760	Q9Y2U8	P10909	Q9BUT1	P04264	P0DOX2
	33	P10909	P04792			P04206	P19021	P04075	Q13421	P25325	P02655	P04083
	34	P56715	P19827			P01766	P15144	P07355	P01011	P46783	Q06830	P00738
	35	Q9UBU9	P19823			P14555	P01019	P0C0L4	P00558	P25398	P04259	P80303
	36	Q92674	P07355			P80188	O14744	P01037	P09211	P62277	P02538	P60709
	37	Q02543	P04406			P01871	P01008	P02774	P50395	P62244	P02787	P06396
	38	Q13421	P68138			Q891S7	P04083	P02647	P06396	P62249	Q13228	P06733
	39	P23769	P68139			P80748	P07355	P18206	P06702	P62269	P30613	P22079
	40	Q9NZU0	P68136			A0A888	O76027	P63267	P04406	P15880	Q86YZ3	P01009
	41	O15247	P68137			P01631	P27695	P21980	P07384	P60866	P32119	P07355
	42	P02814	P68134			Q9UKT9	P02647	P25311	P22314	P63220	P08263	P08727
	43	P10163	P68135			O07948	P02652	P13639	P04075	P62851	P31949	P14555
	44	P01871	P68133			O67809	P06727	P80303	P00738	P23396	P15311	Q02818
	45	P02728	P09211			P01625	P04114	P31946	O75556	P61247	P30044	P14618
	46	P25331	O43707			P20758	P02655	P22079	P04792	P62701	P62937	P0DOX8
	47	P55058	P21980			P01037	P02649	Q7Z406	P15311	P46782	O43324	P0DOX5
	48		P00738			P55058	P02749	P13489	P02647	P62753	P06702	P02538
	49		P80188			Q7CJ75	P07741	P55072	P14550	P62081	P60709	Q08380
	50		P06733			P19181	Q92747	P30838	Q96KP4	P62241	P05154	P07602
	51		Q06830			P98160	O15143	P62258	P00338	P46781	P05109	P98088
	52		P01009			P80303	P61204	P31947	P11142	P08865	P06703	P80188
	53		P01857			P01857	P18085	P07437	P62258	Q9BRK5	P26447	A0A0B4J1V0
	54		P35579			Q8GPG4	P62330	P09228	P30041	P49189	P00558	P07858
	55		P05109			Q6XQH2	P53367	P20061	P11021	Q8TCD5	P68133	P03973
	56		Q04828			P01790	Q5VV41	P27348	Q06830	Q13131	P06733	O60437
	57		Q13162			P25690	Q9NX46	P30044	P0C0L5	Q9Y478	O75874	P01011
	58		P26447			Q2NUT9	P36405	Q99935	P55072	P54619	P01857	P01780
	59		P01871			P00450	P04424	P68371	P13645	Q5TFE4	P49189	P01037
	60		P37802			Q98N43	P61158	Q08380	P30838	P10155	P01009	P02647
	61		P52895			P01717	Q9BPX5	P01871	P06737	P05388	P17066	P07339
	62		P06702			P15241	O15144	P22314	P63104	P05387	P02790	P10412
	63		P12814			P0DM91	O15511	P15311	P60174	P62906	P00966	P61769
	64		P07339			Q8TDN1	Q7L266	P02790	P68371	P30050	P01593	P20061
	65		P02766			P01743	Q92485	Q562R1	P01834	P50914	P20061	Q8N474
	66		P0C0L5			P35908	O95671	P01861	P05109	P61313	P80188	P63104
	67		P0C0L4			Q5NVH5	P05023	Q13228	P30044	P18621	P01034	Q99935
	68		P08758			Q8NEX6	O75964	P37802	P06744	Q02543	Q13421	Q14515
	69		P22079			Q7ZU29	P25705	P04406	Q99935	P35268	P10909	P05090
	70		Q14697			Q6EIZ0	P06576	P52209	P22079	P62829	P01024	P06702
	71		P31949			B0TBP5	P30049	O60664	P01036	P83731	Q13296	P04406
	72		P14618			Q7U662	P36542	P07900	P18206	P61254		Q13217
	73		Q08380			Q55A45	P61769	P07737	P19971	P39023		Q15782
	74		P00338			P57504	O43505	O00299	P35527	P62888		O00391
	75		P22314			B5Y109	Q99933	Q9BQE3	P08727	P62910		P05109
	76		P04075			Q21K21	O95817	P07339	Q06323	P36578		P09211
	77		P05155			Q31F72	Q9BUT1	P68366	Q9UGM3	P46777		P30838
	78		Q00610			Q3B4W2	A1A5D9	Q14914	P23528	P18124		Q01469
	79		P55058				P53004	P00738	Q01518	P62424		O00584
	80		P00751				P30043	P11021	P00966	P32969		P05164
	81		P15311				O75936	P40394	P52209	P52209		Q8NBJ4
	82		P55786				Q5VW32	P02545	P13639	O95336		P00352
	83		P23528				Q96EU7	P06737	P17931	P11021		P11142
	84		P14174				P02747	P80188	P08758	Q8IZP0		O00299
	85		P07858				P09871	P00747	P12429	Q9BWD1		P05787
	86		P84077				P11586	P17655	P68104	Q9NR19		P30740
	87		P30044				Q9BRK5	P01011	P09467	Q13510		P21980
	88		P09525				Q8TDN4	P00338	P16152	P68032		P02545
	89		P07108				Q8N1Q1	P13647	P13797	P60709		A0A0C4DH38
	90		P12429				P00918	Q14515	P01008	O14639		P60174
	91		P04632				P27482	P08758	Q08380	P61160		P00338
	92		P07737				Q9NZT1	P08603	P01871	Q92747		P04075
	93		O43490				P27797	P14550	P36952	O15143		P02750
	94		P09467				O43852	O00151	O75874	O15144		P37802
	95		P30085				P07384	P08727	P07237	O15145		O43852
	96		O75874				Q6MZZ7	P02814	P37802	P59998		P11021
	97		Q15782				Q86VP6	Q8WUM4	P46940	P61158		P55058
	98		Q8WUM4				Q01518	Q01469	P31947	P53999		Q14697
	99		P16152				P20160	P01860	P50995	P13798		Q96DA0
	100		P62979				P40121	P20810	P68363	P07108		P14550
	101		O00299				P42574	P09972	P02790	O75608		P0DOY3
	102		P17931				P31944	P09467	Q9Y5Z4	O95372		A0A0A0MS15
	103		P20061				P04040	P07476	P40394	P07741		P62937
	104		P14550				P07858	P55058	P62937	P55263		P68104
	105		P40121				P07339	P50395	O60664	Q96HN2		Q9BRK5
	106		P08311				Q9UBX1	O95968	P31949	P23526		P0DP08
	107		P30046				P08311	Q04917	P80188	P00568		P07737
	108		P29401				P07711	P09960	P28838	P30566		P00558
	109		Q9BQE3				P25774	P31949	P29401	P30520		P08729
	110		P06396				Q9UBR2	P36952	Q04828	Q01518		P01034
	111		Q16651				Q13938	Q6XQN6	P00751	O95396		Q92743
	112		P52566				P08185	Q14247	P55786	Q15847		P15311
	113		O95968				P16152	P30041	Q9UL46	Q9BW91		P68371
	114		P04080				Q13185	P30086	P80303	P61204		A0A075B6S5
	115		P53621				O14618	P07195	Q8WUM4	P18085		P49788
	116		P08865				P08571	P19013	P09960	P36405		P01619
	117		P46940				P13987	P00390	P02774	Q9UKK9		P0DMV9
	118		P24158				Q16543	P34932	Q6XQN6	Q9Y6U3		O43707
	119		Q96S96				Q00534	Q5VWI1	P09525	P43652		P04792
	120		P13928				P42773	P18510	P40121	O43488		Q06830
	121		P30043				Q14002	O75083	P00390	P49588		P59665
	122		P30041				P00450	Q8NBJ4	Q5VTE0	P14550		P62805
	123		P05388				P08603	P04632	P30086	P00325		Q96S96
	124		P62258				P61604	Q13813	P37837	P00326		P08571
	125		P68105				P10809	Q96DA0	Q9NY33	P40394		P01614
	126		P68103				Q9HD42	O00391	P30101	P11766		P00751
	127		P35237				Q7LBR1	P61158	P07339	P47895		P29401
	128		P25787				O43633	Q15181	P48637	Q8IZ83		P02675
	129		P28066				Q9H444	Q15365	P00326	P30838		P26447
	130		Q15907				Q99653	P18669	P07737	Q04828		P08779
	131		O75891				Q9Y2V2	Q92743	P47895	P52895		P28325
	132		P36955				Q15642	Q9H4A4	O95994	P42330		P08758
	133		P58107				O00299	P07602	P68366	Q96C23		P15924
	134		P61019				Q96NY7	Q06830	P18510	P15121		P01764
	135		O14818				Q96KP4	P00326	P02671	P05186		A0A0C4DH72
	136		Q92930				Q9Y2B0	P28325	P02814	P26572		P23528
	137		O00151				P06681	Q16851	P04632	P02763		P34096
	138		P18206				P01024	P12814	P0DP23	P19652		P01700
	139		Q14118				P01031	P03973	P0DP24	P01011		P12830
	140		P14780				P07357	Q8IZ21	P0DP25	P01009		P25705
	141		Q9BS40				P07358	P28838	P20810	P04217		P07900
	142		P02763				P07360	P62140	P07858	P08697		P27105
	143		P18669				P02748	Q96HC4	P04217	P02765		Q92817
	144		P56537				O43405	Q9NQW7	P35908	P01023		P01859
	145		P13796				P23528	P05120	P02763	P12814		Q8TAX7
	146		Q9UL46				Q86X83	O14745	O75083	O43707		P04433
	147		P81605				P53621	P01763	P31939	P49419		P28799
	148		P61160				P53618	P04217	O00299	P04745		P62987
	149		P01034				P48444	P16152	P13489	P61163		A0A0B4J1Y9
	150		P63104				Q9Y678	P02671	O00151	P02511		P30044
	151		Q9BWS9				Q9BR76	P62136	P04196	P06733		P09228
	152		P41226				P00403	Q9Y6U3	P07195	P06280		A0A0C4DH31
	153		P06703				P20674	P62979	Q01469	Q16706		P07477
	154		Q08431				P10606	P13667	P01764	Q9NTJ4		P60660
	155		Q14974				P09669	Q14508	Q09666	P17050		P0DJI8
	156		Q8WXI7				Q6FI81	P26447	Q99497	Q969X2		P06576
	157		P09228				O75131	Q99497	P20061	P54802		P80748
	158		Q14651				P04632	P67936	P01859	P54920		P18669
	159		P02765				Q96L46	Q9UNZ2	Q13938	Q03154		A0A087WSY6
	160		P15144				P52943	P00739	P02766	Q9H4A4		P02790
	161		P15104				P46108	P30084	P07108	Q01432		P03950
	162		Q9H299				Q9UBG3	P04004	Q06210	Q6FI81		A0A0C4DH68
	163		Q00796				P02511	P45974	P0DOY2	P03950		P08603
	164		P59998				Q14894	P29966	P0DOY3	O95841		P07996
	165		P68372				Q9UNS2	Q7Z4S6	P26447	P01019		Q96DR8
	166		Q06323				P21291	Q00796	P32119	Q8IZ07		P02679
	167		Q96IU4				Q13618	Q32MZ4	P40925	P04083		O14745
	168		P52907				Q6UXB2	Q13217	P05787	P50995		O14773
	169		P60900				P01040	P38606	P01591	P07355		P01714
	170		P55064				P04080	Q9ULZ3	P01034	P12429		Q02809
	171		P45877				P01034	P98088	O95968	P09525		P12429
	172		Q9Y315				P28325	Q9BW04	P34932	P08758		Q13296
	173		P19971				Q15828	Q9Y4L1	P04080	P20073		P23284
	174		Q8NHP1				P01036	Q8TE77	P18669	P13928		Q13228
	175		P02743				Q14118	P04430	P78371	Q5VT79		P30041
	176		P08571				Q9UJU6	P01034	P01780	O95994		P13639
	177		P60953				Q8IZD4	P05387	Q7Z406	P03973		P25815
	178		P06737				Q96C86	Q9Y5Z4	P36871	P01008		P07237
	179		O75369				Q9H773	Q96NY7	P60660	Q10567		P40121
	180		P62333				O94760	O95359	P04179	Q9Y6Q5		P01718
	181		O95336				O95865	P35908	P84077	O95782		A0A0B4J1X5
	182		P31947				Q16531	P23526	Q16851	O94973		Q7Z406
	183		P31946				Q5TDH0	Q96TA1	P61158	P63010		P14314
	184		P18510				Q92499	P11766	O00391	Q96CW1		Q04828
	185		P61769				Q9Y2R4	P17987	P52907	O00203		P13987
	186		P52565				Q16698	P56537	Q00796	P02647		P06703
	187		Q14624				P59666	P35527	Q15782	P02652		P01033
	188		P27348				Q9Y315	P11216	P10599	P06727		P81605
	189		Q14204				P60981	P27482	P02675	P04114		Q14508
	190		Q15365				P23743	P43652	P55058	P02654		P55064
	191		P60842				P51659	P26641	P19823	P02656		O95994
	192		Q12792				P00367	P05787	P14314	P05090		P02671
	193		P10586				P09417	P54727	P67936	P02649		P02774
	194		P63241				Q00796	O15020	P06703	O14791		E5RIL1
	195		P63242				Q9UBS4	P26038	P31946	Q07812		P61916
	196		Q9UH17				Q9UBT3	P06727	P00747	Q9ULZ3		P14923
	197		P62879				Q8TF09	P40925	Q16719	P52594		A0A075B6I0
	198		O14579				P31689	P36871	Q9HC38	P05089		P08670
	199		Q01469				Q8WW22	Q12792	Q96DA0	P54136		P06312
	200		P13716				P25685	Q15149	P01766	P04424		P52209
	201		P62873				P25686	P15104	P13798	P00966		P20160
	202		P07996				Q13217	P58107	P23526	P18440		Q13162
	203		P30086				Q9UHL4	P17812	O95834	O43776		P13796
	204		P08263				Q9NY33	P00966	P02750	P17174		P30101
	205		P20062				P27487	P04003	P01037	P14868		Q6UXB2
	206		Q14764				Q12882	P20618	P06576	Q9ULA0		P04080
	207		P34949				Q9Y295	P01611	P06727	Q15121		P06310
	208		Q13510				Q14126	Q6ZVX7	P27348	Q9UBB4		P0C0L4
	209		P22352				Q9BVJ7	P78371	P50990	O43681		Q09666
	210		P21217				Q14204	Q15847	P80748	P61221		Q96KP4
	211		Q99460				P40939	Q96G03	Q13126	Q8NE71		Q9UBR2
	212		P25788				P55084	Q15907	Q15365	Q9NUQ8		P31151
	213		P08670				Q9NTX5	O15231	Q9BRF8	P53396		Q99497
	214		P15559				P30084	Q14651	P30085	P17858		P04004
	215		Q04917				P68104	Q96L46	P47756	P08237		P01701
	216		Q02487				P24534	Q15084	P30153	Q01813		P30086
	217		P09455				P13639	P55011	P27797	Q92499		A0A0C4DH24
	218		Q12882				Q96C19	P17858	P04004	Q9NUU7		P06727
	219		P08246				Q9H223	P35241	O43852	Q9UMR2		P36955
	220		P04179				Q13347	P31948	O60437	O00571		Q14118
	221		P05386				Q9UBQ5	Q9UBQ7	P27482	O75882		P31146
	222		P20160				B5ME19	P12109	P01877	Q99933		Q11201
	223		P07203				P19957	P46108	P19105	Q9H4G0		A0A0C4DH29
	224		Q8NES3				P08246	P05090	P02679	P98160		P07384
	225		P25815				Q15006	Q8N335	Q96TA1	Q7L1Q6		O43653
	226		P00492				P06733	Q9UJU6	P52565	Q9Y6E2		O00592
	227		P12724				Q9UHY7	P02652	P06753	O95395		P01594
	228		P02671				P14625	P01008	P43490	Q8NES3		Q16651
	229		P22392				Q9NZ08	P21281	P54727	O43505		P04259
	230		P05120				P62495	P41226	P60842	P02749		P63261
	231		P68402				Q6P6B1	Q13126	Q86VP6	P61769		A0A0J9YXX1
	232		P68401				P30040	P02533	P35237	Q562R1		P23083
	233		P03950				Q9BS26	Q92896	P60900	P49407		P22314
	234		P13726				Q8TE68	P07996	Q08257	P06865		P0DOX4
	235		P22626				P10768	Q16543	Q02818	P07686		O95436
	236		P50570				O95571	P10599	P08670	O00462		P25774
	237		P21964				Q92817	Q15782	P05155	P55957		P01008
	238		P13688				P50502	P61204	P09210	Q13057		Q06323
	239		P40925				Q9NUQ9	Q9H2G2	P11216	P34913		P09467
	240		P61163				P12259	Q9BR76	P59998	P07814		P40394
	241		P07327				Q01469	O95336	P49189	P31939		P22352
	242		P35754				Q92520	P01597	P52566	P53004		P17931
	243		O75882				P49327	P23396	Q14624	P43251		P31949
	244		P62304				Q6ZVX7	O95361	O00764	Q9H3K6		P19957
	245		P07195				Q13630	P05164	P22392	P11274		Q9NZT1
	246		Q15293				P49789	P08670	P02765	P56945		Q6MZM9
	247		P23396				P02675	P01040	P02511	O75363		O95969
	248		Q15056				P20930	Q9BRK5	Q9H4A4	Q9Y6D6		Q15847
	249		Q9Y274				Q00688	P05546	O75891	Q9NXR7		P14174
	250		P06727				Q02790	Q6MZM9	P13796	Q15018		O60888
	251		Q13126				P14324	Q13938	P48147	Q5VW32		A0A075B6I9
	252		P49327				Q9P2B2	Q96C23	P63241	P11586		Q9Y4L1
	253		Q92530				P04066	P49419	P30046	P04003		P40925
	254		P21108				Q9BTY2	Q02809	P40227	P12830		P02749
	255		Q99878				P04406	Q04828	P19013	P63098		P67936
	256		Q9UBR2				O95479	O95171	P21964	Q9Y376		P04217
	257		Q15257				Q14376	P30043	P40926	Q9H9S4		P01023
	258		Q11201				P07902	Q16204	O75368	Q9HB71		P08246
	259		P11586				Q7Z7M9	O75891	P20618	Q13938		P08174
	260		O75841				Q86SF2	P01593	P45974	P0DP23		P05155
	261		Q13630				P62873	Q92817	P35579	P27482		Q86X29
	262		P07741				Q9UBI6	P07203	P25788	Q9NZT1		P08311
	263		P07384				O95395	Q96S96	P07477	P04632		A0A0C4DH34
	264		P80303				P35573	P26599	P23083	Q96L46		P00326
	265		P50995				P31150	Q86X29	P56537	P07384		Q04695
	266		Q96FW1				P50395	P15924	Q9ULZ3	Q6MZZ7		P05186
	267		P22234				P52566	P37837	P42224	P17655		P31946
	268		P01876				P06396	O43175	O95336	Q9Y6W3		P31947
	269		P0DMV8				Q9BVM4	A0MZ66	P00441	P20810		P49257
	270		P0DMV9				O75223	Q01813	P01743	Q99439		P01042
	271		P47895				O95749	Q8IWE2	P01772	P27797		P10599
	272		P11142				O14908	O95747	P06310	O43852		P16401
	273		P00352				P15104	Q9NR45	P13693	P13861		P04196
	274		P05164				P35754	P47755	P17858	P56211		Q5VSP4
	275		P04040				O76003	P53621	P20073	Q8N1Q1		P02765
	276		P06744				Q9NZD2	P19105	P23284	P35219		P11279
	277		P28838				P14314	Q13630	P25789	P16152		P05783
	278		P36871				P34896	P41250	P26641	O75828		A0A0A0MT36
	279		Q86YZ3				O60547	P21399	P28065	Q96IY4		P32119
	280		P08238				Q9Y5P6	P00441	P36955	O75976		Q5D862
	281		Q13228				P46926	P25787	P38606	P22792		P15144
	282		P00390				Q14789	Q96C19	P61026	Q9Y646		P61586
	283		P07602				Q8NBJ4	P22102	P61981	P49747		Q9HC38
	284		P22894				Q8N335	P02656	Q04760	P67870		P31944
	285		P01008				P62993	Q9BZQ8	Q14011	P29466		P02652
	286		Q8NBJ4				Q9UBQ7	P42224	Q15847	Q92851		P00390
	287		P11021				P28799	P67775	Q6MZM9	P31944		O60664
	288		Q01518				P38646	P23381	Q96C19	P42574		Q9UL46
	289		O95834				Q8TAX9	Q6P6B1	Q96C23	P55212		P09758
	290		P17655				P48637	P49189	Q9BR76	P55210		Q8NBJ7
	291		P31939				Q92896	P13798	Q9Y6U3	Q14790		P60981
	292		P09960				P09210	P80748	P08294	P04040		P01704
	293		P02675				P78417	P47989	Q15907	P21964		O75888
	294		P02790				P09211	P01767	P14174	P35221		O75828
	295		Q9UJJ9				P07305	P02748	P78417	P07858		Q6EEV6
	296		P26641				P16403	Q9BTW9	P01042	P07339		P35754
	297		Q9Y4L1				P16401	Q13045	P05164	Q9UBX1		P22392
	298		Q9Y678				Q92522	Q15642	Q12792	P07711		Q6UXB3
	299		Q16401				Q99878	P34949	P61160	P25774		P45877
	300		Q9NZL9				O75367	P13010	Q96G03	Q9UBR2		P30085
	301		P50897				P62805	O95861	Q14974	P16070		P19105
	302		P20073				Q13442	P55957	Q9NR45	O43866		P02766
	303		P34896				P69905	P60953	P12830	P13987		P68871
	304		Q9Y6Q5				P68871	P31146	Q9NQW7	Q15642		P50238
	305		P34932				P51858	Q9UKN1	P19827	P60953		P04632
	306		Q92743				Q9NRV9	Q06323	P06331	P62633		O95336
	307		O00391				P02790	Q9Y3Z3	Q15181	P29373		Q9Y6U3
	308		Q16706				P07686	Q9Y371	Q96S96	O75503		O75083
	309		Q16719				Q93099	Q7Z6Z7	Q96IU4	P00450		Q13510
	310		P52597				P49773	Q99733	P25815	Q9UQN3		Q13867
	311		P11172				P14866	Q15293	P17655	Q9BWS9		P47756
	312		Q9UEW8				O60506	P05543	P28066	Q15782		Q8WXI7
	313		O15143				P04196	O00231	P49591	O00299		P02763
	314		O15144				P0DMV8	P07954	P51149	O95833		Q01518
	315		Q7Z7M9				P08238	Q86SF2	P43034	Q96NY7		P55072
	316		P62820				P34932	Q9H6S3	O00534	Q9Y259		Q8WVQ1
	317		O95841				P11142	P12429	Q9BW30	O60271		Q99456
	318		O95395				P04792	Q9BS40	P05090	Q00610		P0DP01
	319		Q9Y371				Q92743	P43034	Q9UBQ7	Q14677		Q2M2I5
	320		Q13217				A0A0B4J1X8	Q9H444	O14745	P10909		P08582
	321		Q9HC38				A0A0C4DH42	Q9NZT1	P01040	Q11201		P12035
	322		P68366				A0A0B4J1Y9	P22061	P48668	P12259		P04745
	323		P68371				A0A0B4J1V6	P61088	Q15435	P00748		A0A075B6K4
	324		P21283				A0A0B4J1X5	Q10567	Q14847	P05160		A0A0B4J1U7
	325		P67775				A0A0C4DH38	Q96PD5	P49419	P53621		Q5QNW6
	326		P54802				Q5T013	P55036	P08603	P53618		P0DP04
	327		Q9UN36				Q9Y4L1	P25786	P30520	P35606		Q15323
	328		P05455				P14735	P08708	P31948	P48444		A0A0A0MS14
	329		Q9Y230				O75874	P54578	P62987	O14579		Q6FI13
	330		P54920				P05198	Q8NF91	P08238	Q9Y678		A0A0C4DH43
	331		P31146				P41091	Q06210	P22626	P23528		P78385
	332		P48637				P60842	Q86SQ4	O14818	Q6P1N0		Q13438
	333		P48643				P63241	P24534	Q14894	Q16204		Q9UBT3
	334		P07437				P56537	P40306	Q9Y490	O75534		A0A0B4J1V6
	335		P23526				P01591	Q9H173	P28062	P12109		A0A0B4J2H0
	336		Q13200				P15814	P14324	P61088	P02746		Q7Z794
	337		P33176				Q14116	Q9NZU5	O75347	P02747		P07711
	338		Q16543				P30740	P04155	P30043	P00736		Q71DI3
	339		P41218				Q12905	P05198	P07602	Q9NZP8		P15328
	340		P41252				Q14974	O75882	O43175	P09871		Q71U36
	341		P07814				P80217	P02763	P13716	P06681		Q06828
	342		P63244				P49441	P28066	P61970	P01024		O95841
	343		P15924				Q15181	Q96HE7	Q9UN36	P0C0L4		Q8N1N4
	344		Q15019				P46940	P62424	Q9H008	P0C0L5		A2NJV5
	345		O43852				Q8WZA9	O60216	O15511	P01031		Q99102
	346		Q15181				Q96CN7	P61160	O60547	P13671		Q9H173
	347		Q9ULA0				P17301	Q9C0C2	P07996	P10643		A0A075B6I1
	348		Q99574				P05556	P52597	P98088	P07357		O60938
	349		P25786				P19827	P48444	Q8NBJ4	P07358		P01817
	350		O75094				Q14624	P34096	Q92688	P07360		Q9BWS9
	351		Q99733				P13645	P11586	O15143	P02748		O76013
	352		P27361				P13646	P62826	O15145	P08174		O95395
	353		P17980				P02533	P19652	O75131	P00751		Q9UBX1
	354		P27487				P08779	Q8WVQ1	P00734	P00746		Q99574
	355		P00747				Q04695	P61960	P01033	P08603		P48723
	356		Q07960				P05783	Q99613	P01714	Q03591		Q9Y624
	357		P27797				P35527	Q53FA7	P01717	P36980		O95171
	358		P00966				P04264	P25788	P05387	P05156		Q08431
	359		P29218				P13647	P68036	P07910	P61201		Q13509
	360		P63261				P04259	Q9BRF8	P07954	Q9UNS2		P15907
	361		Q9NQT8				P05787	Q6IBS0	P08865	Q9BT78		Q9UHD0
	362		P02652				Q9UIJ7	P19021	P13646	Q92905		P01706
	363		P02679				P29622	Q99536	P15374	Q7L5N1		P01762
	364		P02750				P13861	Q14118	P16402	Q9UBW8		P01766
	365		P02751				P33176	Q9UQ80	P16403	Q99829		A0M8Q6
	366		P02760				P03952	P22626	P19652	O00244		Q13835
	367		P55072				P01042	P49588	P25787	Q53SF7		P27487
	368		P12259				O60256	O75828	P26639	P22528		Q9NZ08
	369		P29692				P14618	P09525	P30048	Q9UBG3		P11488
	370		P62195				A0A0C4DH72	O75976	P50502	Q9BR76		P01877
	371		P37837				A0A0C4DH73	P01714	P50991	P57737		P01743
	372		Q9NYU2				A0A0C4DH68	Q9NZ08	P61019	P08185		A0A0C4DH25
	373		P45974				P01624	Q96KK5	P61769	Q9P1F3		Q14525
	374		Q13421				A0A075B6S4	Q9Y678	P62328	P12277		P01601
	375		P22102				A0A0A0MT36	P59666	P62942	Q6UUV9		P04430
	376		P68104				P05455	P35237	P68871	P46109		Q58FF7
	377		P47755				Q9GZZ8	P15289	Q01105	P17812		A0A075B6J9
	378		P47756				P11279	P22352	Q04446	Q13616		Q9NSB4
	379		P49257				P42166	Q8IZ83	Q13813	Q13617		Q05707
	380		P47897				Q14847	Q12797	Q14247	Q13618		P38159
	381		P30520				P31025	Q9Y3F4	Q14914	Q86VP6		Q14767
	382		P49441				P07195	O43866	Q16881	Q6UXB2		P16070
	383		P14625				P17931	P25325	Q53EL6	Q00534		Q5T749
	384		P61158				Q08380	P29374	Q53FA7	P04080		P55795
	385		Q14103				Q04760	Q9BW30	Q6ZVX7	P01034		Q15109
	386		Q99519				Q9H008	P30085	Q96FV2	P28325		P09668
	387		O60547				Q9NUP9	Q9Y2K2	Q9BUT1	P01036		Q8IZA0
	388		O60610				P43034	P11171	Q9UJU6	P09228		P55259
	389		P50395				P49257	P22059	Q9UKK9	P01037		Q9UJJ9
	390		P01019				Q12907	P04066	Q14118	P21291		Q15907
	391		P01033				P02545	P62263	Q15257	P50238		Q9NVJ2
	392		P50502				P20700	P36405	P02652	P52943		P53634
	393		Q8N335				Q8N1G4	P20290	P21399	P49589		Q99954
	394		Q16181				Q96AG4	P49788	P08729	P21399		P15291
	395		Q15435				P62310	P51884	Q8IZ83	Q14204		Q11128
	396		Q9UBQ7				P51884	P52272	P04430	Q7L576		Q92896
	397		Q96DA0				A0A075B6K5	Q13296	P53634	P28838		A0A0B4J1V2
	398		Q9H0W9				P04211	P62906	P15814	O75891		Q15746
	399		Q9UNM6				A0A0B4J1Y8	Q9UJ70	P01767	Q96KP4		Q15904
	400		Q86VP6				Q9BS40	P51149	P60981	P49902		A0A0J9YX35
	401		Q8WVQ1				O75608	P61604	Q9P1F3	O43175		Q14CN4
	402		O00231				O95372	P01715	P34896	P30046		P59666
	403		Q9BRK5				Q6UXB3	Q9Y2S2	O00584	Q86X76		P0C0L5
	404		Q9NR45				P61626	Q9BX66	Q15293	Q6UWP2		P00966
	405		Q9NZ08				P33908	Q96HN2	O75223	Q9UGM3		P28838
	406		Q6P531				O00462	P29373	P07437	P13716		P35579
	407		P00558				P48163	P48735	P49368	Q5VZ89		P06737
	408		Q96KP4				P29966	Q16585	Q8WXG9	Q9Y3Z3		Q8WUM4
	409		Q99102				Q96EY5	Q9H9H4	P25774	O00115		P47895
	410		Q71U36				Q8NI22	Q6UXB2	P17987	Q9Y315		P50395
	411		O75351				P40926	Q6P996	P04746	P81605		O75874
	412		P13639				P31153	O60732	P12955	Q02487		P46940
	413		P15291				P14174	P41567	P02748	Q02413		P68363
	414		P10599				Q9UNW1	P49327	P55327	Q14126		P19971
	415		P11215				P27361	P53384	P01624	P15924		P06744
	416		P62140				P09238	Q14195	P49720	P60981		P13489
	417		P00918				P14780	P35606	P46459	P23743		Q14764
	418		P43034				Q9H8S9	P12259	O75369	Q9UBT3		P13797
	419		P17174				O96033	O76041	P01721	P09417		P50995
	420		P52209				P26038	Q14166	Q13510	Q14195		P62258
	421		P27105				Q13724	O95865	P46976	Q12882		P16152
	422		P35606				P36507	Q7Z5P9	P61604	Q01459		P17655
	423		O95782				P34949	O75367	Q9BRA2	P53634		Q14624
	424		P11717				Q13126	P14174	P15104	Q9UHL4		P29508
	425		P15309				Q9BV20	O43776	P63151	Q9NY33		P15104
	426		P55263				P58546	Q99584	Q12765	Q9P265		Q00610
	427		Q9NTK5				Q96DR8	P35326	Q9BS40	O14672		P19823
	428		P12109				Q14764	P48637	Q9NUQ9	Q9Y2H0		P49368
	429		P17213				Q99417	O95817	Q9UH17	Q16531		P55786
	430		P01833				Q969H8	P46109	P24666	P31941		Q6XQN6
	431		Q02818				Q9HB07	P46781	Q8NHM4	P25685		P37837
	432		P53618				P35579	P62879	P14625	Q13217		P31939
	433		P30838				P43490	Q86UD1	P61960	Q9UJU6		Q00796
	434		Q14515				Q6BCY4	P07357	Q86X29	P46734		O00151
	435		O00462				O43639	P09758	Q9ULA0	P45985		P78371
	436		P02749				Q13232	P14854	P53004	Q9BVJ7		P09525
	437		P02774				Q15843	Q9H1E3	P07741	Q14203		P23381
	438		Q9Y490				Q9UMX5	P14923	P27361	Q13561		O43175
	439		P04066				Q99519	Q8NBF2	P49773	Q9UJW0		P18206
	440		O00560				Q99574	P30050	P62857	P50570		P08263
	441		O00592				O14745	Q96MK3	P09758	P63167		P00747
	442		P25789				Q9BZQ8	Q14677	P13647	P63172		P36952
	443		Q15084				Q96TA1	A0AVT1	Q10567	Q14118		P30153
	444		P21333				Q86X76	P23284	Q13404	Q14258		P27797
	445		Q9NTX5				Q9NQR4	O60884	P63244	Q9Y4X5		Q99879
	446		Q9NUQ9				P22307	P62191	Q13630	Q9UNE7		P11216
	447		P06576				P06748	Q6PCB0	Q01813	Q7Z6Z7		P48637
	448		O60664				P46459	P01703	O43865	Q63HN8		P00734
	449		O43488				Q8TCD5	P08582	Q3LXA3	Q5T4S7		Q15365
	450		Q10567				P61970	O94973	P25398	O95834		P17858
	451		P35573				Q02818	P55735	P36405	Q9HC35		O60547
	452		Q13838				P19338	P62195	P23381	Q96C19		P40227
	453		P60660				Q9Y266	P12004	P30626	Q12805		Q13938
	454		Q7Z406				Q6DKJ4	P36543	Q13217	Q9NZN3		Q15181
	455		P07900				Q9Y3B8	Q9BTY2	P31941	Q9H223		P21964
	456		Q8N474				P22059	P23743	P61163	Q92616		P07203
	457		Q86X29				Q92882	P21283	Q15370	P68104		P19827
	458		Q13813				O95747	Q6P531	P49788	Q05639		P50990
	459		Q92896				P68402	P35754	Q9UJ70	P29692		P50991
	460		P62937				Q15102	P42574	Q7Z4W1	P26641		P45974
	461		P60174				P14555	Q13564	P19338	P13639		P27348
	462		P04899				P11940	P04040	P04433	Q15369		P30043
	463		P00326				P05120	Q2VIR3	P28325	Q99961		P05023
	464		Q687X5				Q9NVE7	P01772	P61586	Q9Y371		P49189
	465		P36952				Q99497	P49913	Q14515	Q9NR46		P07741
	466		P13489				P23759	P14868	O15144	Q9NZ08		P60842
	467		P01011				Q9BUH6	P30048	P01824	P14625		P43490
	468		P08603				Q15365	O76003	Q04637	Q92817		P38606
	469						Q99447	P57058	O43776	Q8TE68		P48643
	470						Q9BUL8	Q15046	P01701	Q9H6S3		P50502
	471						O75340	P54826	P11766	P61916		P09960
	472						Q9NRA1	P30040	P25786	Q9Y2E5		Q16851
	473						P07237	P54136	P11413	P58107		P00568
	474						P30101	Q15008	P22061	Q9H0W9		O75891
	475						P13667	P49721	Q9NZT1	Q99447		P23141
	476						Q15084	Q9BRP8	P50452	Q9NTX5		Q06210
	477						O00151	O94760	Q99471	P60842		Q9BZQ8
	478						O00764	O95782	Q99832	Q14240		P63000
	479						Q13113	P04080	P12814	P15170		P49773
	480						P30086	P13645	P26599	P62495		P18510
	481						Q96S96	Q9NQR4	O95394	P05198		P84243
	482						P12955	Q16222	Q14376	P20042		O95834
	483						P22079	O60927	P43652	P41091		P63241
	484						O60925	Q07960	P08571	Q9BY44		Q9NY33
	485						Q9UHV9	Q8TE68	P17174	Q14152		P34896
	486						Q9NQP4	Q8N257	P31146	P55884		P28066
	487						O15212	Q13200	P48643	B5ME19		P00441
	488						P17858	P49720	Q99933	O15371		P84077
	489						Q01813	P62820	Q9BZQ8	P60228		P34932
	490						P00558	P24158	P01768	O00303		P61158
	491						P36871	P80723	P18827	Q9Y262		P20810
	492						Q96G03	P13591	Q9NQR4	Q7L2H7		P02511
	493						Q96PD5	Q07157	P05452	Q04637		P07195
	494						Q92696	Q9UHV9	P13861	P78344		Q99832
	495						P35232	P61019	P25325	P06730		P08238
	496						Q99623	P09455	P32456	Q15056		O14818
	497						P61457	O95613	Q14651	P55010		P25786
	498						Q9H0N5	Q9UHD8	Q16651	P63241		P52566
	499						P01833	P62495	Q9BRK5	P56537		Q16719
	500						P12273	Q07020	Q9UH65	O14980		P27361
	501						Q00169	Q15404	Q9UQ80	P55060		P46459
	502						P14923	Q16401	O00170	Q9UIA9		P11413
	503						Q9Y263	Q3LXA3	O14773	Q9GZZ8		O00764
	504						P00747	Q16270	O43390	Q16610		Q9H4A4
	505						Q04941	Q9Y333	O43488	Q8IWU5		P61160
	506						Q14651	E9PAV3	O43598	P08294		Q93077
	507						P13796	P52888	O43765	P15311		P78417
	508						P13797	P17096	O60888	P52907		P62140
	509						O15305	Q04760	O75531	P47755		P60953
	510						Q6XQN6	P26640	O94804	P47756		Q14651
	511						P27169	Q15819	O95861	Q5VZK9		P23526
	512						P62136	P42025	P00505	P14324		O15144
	513						P62140	Q9Y617	P00568	Q16658		P01861
	514						Q15435	Q9BV20	P01611	P49327		Q9NR45
	515						P24666	Q96I99	P01597	Q01469		Q9BS40
	516						P48147	P16401	P01593	Q9UK22		Q14974
	517						Q9HAB8	P49662	P01619	Q6ZVX7		P08865
	518						P62937	Q9NZZ3	P01700	P02671		Q01813
	519						P23284	Q9BV57	P01703	P02675		Q9BR76
	520						P45877	O75822	P01860	P02679		P13798
	521						Q06830	Q687X5	P02144	Q06828		P61981
	522						P32119	P25398	P02533	P02751		P01019
	523						P30041	P30711	P03973	P23142		Q13126
	524						P07737	P46777	P04003	P98095		Q86VP6
	525						Q99935	P07814	P04066	Q5D862		P52565
	526						Q6MZM9	P53618	P04211	O75369		P01860
	527						P62191	P81605	P01814	P30043		P20073
	528						P17980	P16403	P05120	Q05397		Q14204
	529						P35998	Q9Y3I0	P05198	P15328		P19652
	530						Q16651	Q99614	P05543	P09467		P29692
	531						P55786	O75503	P06312	P04075		P31941
	532						P25787	P14780	P07203	P09972		P15559
	533						P25788	P62330	P07711	P07954		P40926
	534						P28066	P50552	P08185	P16930		P11766
	535						P60900	O00232	P08697	P09958		P20618
	536						O14818	Q13185	P08754	P07902		Q9UN36
	537						P20618	P47929	P09228	P21217		P25788
	538						P40306	Q5TDH0	P09417	P17931		P02649
	539						P49721	Q96AT9	P09429	Q08380		P26641
	540						P49720	O75223	P0CG04	O75936		P07108
	541						P28070	Q9NP79	P13667	Q92820		P0DP25
	542						P28062	Q8NES3	P15313	O75223		P35237
	543						O00487	Q15714	P15559	Q8TAX9		P62195
	544						Q13200	Q13510	P15941	P57764		P02748
	545						O43242	P05109	P19961	Q13630		Q15435
	546						P55036	P62269	P22352	O60547		Q16204
	547						Q15008	P55145	P24534	P06396		P21281
	548						P51665	Q5M9N0	P28070	O60763		P25789
	549						P48556	P54577	P28482	Q9NQX3		P07437
	550						O14684	Q15102	P28799	O95749		Q04760
	551						Q14914	Q8N1G4	P29373	P53609		P36871
	552						Q8N8N7	P35573	P30040	Q92696		P05546
	553						P20962	Q6UXS9	P30047	Q96EK6		P59998
	554						Q06124	O14907	P30084	P46926		P17987
	555						Q6GMV3	Q9NZR2	P31153	Q6PCE3		Q96HC4
	556						P22102	Q9UKK9	P32455	P11413		P60900
	557						O15067	P61081	P35221	P06744		P01782
	558						P30566	Q14134	P35268	P14314		P01615
	559						P31939	P09622	P36543	P48506		P42224
	560						P30520	P57735	P38646	Q6P6B1		P25398
	561						P11216	P15291	P40306	P15104		P20591
	562						P22695	P00492	P42126	Q6IA69		Q8TE77
	563						Q08257	Q7Z7M9	P43251	Q06210		Q13630
	564						Q53FA7	Q16666	P45877	P47897		P61970
	565						O00391	Q6YHK3	P46782	Q16769		P25787
	566						Q5T6V5	Q16394	P46926	P35754		Q9ULA0
	567						P61106	Q8TF46	P47989	O76003		Q9NQW7
	568						P62820	P40939	P49441	P07203		Q6ZVX7
	569						P57735	Q07812	P51858	P22352		P01889
	570						P61019	P31937	P52597	P00390		O15143
	571						Q9NRW1	Q9C002	P55011	P08263		P13693
	572						P51149	Q9HCI5	P55957	P09488		P08697
	573						P51151	Q13438	P58546	P78417		Q96TA1
	574						Q9H5N1	Q9P265	P59666	P09211		Q12792
	575						P29373	P01780	P60709	P30711		Q96G03
	576						P63244	O15143	P60903	P48637		P62333
	577						P61224	P61966	P61247	P04406		Q16881
	578						P62491	P07360	P61956	Q8N335		P28065
	579						O00194	Q6YP21	P61966	P41250		Q9UJU6
	580						Q9Y3P9	O60493	P62249	P35573		Q9H0U4
	581						Q92804	Q86XI8	P62310	P11216		Q9Y5Z4
	582						Q15293	Q7Z408	P62834	P06737		Q8IZ83
	583						P54725	Q9HCH3	P63010	P46976		P53621
	584						Q07960	Q9NTX5	P63208	Q9NZD2		P0DOX3
	585						P61586	P01619	P68036	Q9HC38		Q14914
	586						P13489	Q92851	P81605	Q9UBQ7		O75347
	587						Q9HB40	P03950	Q02487	Q9P2T1		P62826
	588						P62913	P31151	Q02809	Q92896		P48147
	589						P30050	Q6ZUJ8	Q03154	Q8NBJ4		P30520
	590						P26373	Q9H1R2	Q04917	P28799		P13010
	591						P40429	P12532	Q12882	Q14393		P56537
	592						Q07020	P09914	Q13561	P62993		Q9BRA2
	593						P84098	P68402	Q13838	P30047		P11586
	594						P61254	O60841	Q14116	Q14C86		Q14894
	595						P62899	Q9Y295	Q15084	P62826		Q12765
	596						P46777	O95433	Q15691	O00178		O43776
	597						P62424	Q8N573	Q15843	P04899		P02760
	598						P05388	P02747	Q16543	P32456		Q15293
	599						P05386	Q9ULC4	Q5JWF2	Q9H0R4		O00534
	600						P05387	P22304	Q5VT79	P00738		P43487
	601						P34096	P06312	Q6EEV6	P00739		P17980
	602						P51991	P50583	Q6UXB3	P48723		Q9UBQ7
	603						P25398	Q9Y5P6	Q6ZWH5	P0DMV8		Q08257
	604						P62277	Q9NQP4	Q71DI3	P34932		P09429
	605						P62263	Q8TAT6	Q86X76	O95757		Q96HN2
	606						P62244	Q4ZHG4	Q8IYD1	P11142		Q53EL6
	607						P62249	O14497	Q8N474	Q92598		Q8N335
	608						P62269	P43251	Q8TE77	P04792		P52907
	609						P39019	Q8TAE6	Q92499	P07900		P02743
	610						P63220	B2RPK0	Q96FW1	P08238		O15145
	611						P62851	Q15113	Q96L46	Q9NRV9		P35268
	612						P62857	P62633	Q96NY7	Q9Y5Z4		Q9NRX4
	613						P23396	Q15057	Q96QK1	P69905		P04003
	614						P61247	P16035	Q99574	P68871		Q9UEW8
	615						P46782	Q13442	Q99584	P02790		Q96PD5
	616						P62753	Q9Y266	Q99954	P05546		P14625
	617						P46781	P53004	Q99961	P51858		P17812
	618						Q9Y3I0	Q9NZV1	Q9H299	P09651		P62263
	619						Q9Y230	Q9UJ68	Q9H2H8	P51991		Q9Y490
	620						P25815	Q92520	Q9H361	Q14103		P54920
	621						P26447	P10643	Q9H444	P31943		O95861
	622						P06703	O95831	Q9NQX3	P61978		P43034
	623						P31151	P15328	Q9NRV9	P52272		Q9H008
	624						P05109	Q9H8J5	Q9NTK5	O60506		P24666
	625						P06702	Q9P2R3	Q9NYL9	P09429		P22626
	626						P60903	P24752	Q9NZL9	P49773		P39019
	627						P31949	Q92882	Q9NZN3	P04196		P02751
	628						Q99584	P55212	Q9UBG3	P12081		O95361
	629						Q9HCY8	O60613	Q9UHV9	Q93099		P60903
	630						Q63ZE4	P51148	P26038	Q86YZ3		Q9H0W9
	631						Q9HBR0	O75884	Q14764	P50502		P02753
	632						P35542	Q5TFE4	P29466	Q16543		P32455
	633						P23526	P50591	P23588	Q16775		P10809
	634						P02743	Q13057	P07476	Q01581		P52895
	635						P17900	Q99598	Q9BVG4	P00492		Q53FA7
	636						Q9NR31	O60271	Q9HAT2	Q9Y4L1		P69905
	637						Q9BW04	Q99828	Q32P51	P0DOX2		P62241
	638						Q6UWP8	Q96T51	O15212	P0DOX3		P36543
	639						P53992	Q9NZP8	Q9UBC9	P0DOX5		P30046
	640						O15127	P06280	P04040	P01876		P49591
	641						O95171	Q9UBT3	P17980	P01877		P49755
	642						Q14108	Q9NZN3	P54578	P01859		P36405
	643						P18827	Q53H82	P11586	P01860		P05156
	644						P31431	P20160	P53384	P01861		Q5VT79
	645						Q92599	P28072	P62906	P01871		P10768
	646						O43175	Q12962	P21675	A0A0C4DH31		Q13404
	647						Q9Y617	Q13546	P21281	P23083		P04746
	648						Q15393	Q14126	Q86SG5	P01743		Q7Z4W1
	649						P23246	Q92900	P04424	P01742		P02656
	650						Q8N474	P49748	O43681	A0A0B4J1V2		Q96IU4
	651						O95968	P62857	P54619	A0A0C4DH43		P30050
	652						O75556	Q7Z4V5	O60701	A0A0B4J1V0		P58546
	653						Q99961	P02743	P02760	P01764		P05387
	654						O75368	P04424	P48444	A0A0B4J1X8		Q96BW5
	655						Q9UHJ6	Q9H788	P35754	P0DP04		Q07020
	656						Q11201	Q9H6T3	Q9UNM6	A0A0A0MS15		Q9BRF8
	657						Q9NR45	Q7L1Q6	P09497	A0A075B6Q5		P01717
	658						P63208	P39019	O75882	A0A0J9YX35		P62873
	659						Q9H156	P35219	Q8WVQ1	P01780		P49721
	660						Q9H2G2	P01701	P20591	A0A0B4J1Y9		P27482
	661						P03973	Q11201	P61978	P01782		P16615
	662						P62316	P50570	P01019	P06331		P62191
	663						P62318	P48163	P01615	A0A0C4DH38		P27169
	664						Q99954	P25774	P49902	A0A0B4J1U7		P30040
	665						P54920	P09488	Q9BT78	P01591		Q04917
	666						Q99747	P36954	Q6DKI2	P01834		P04843
	667						Q7KZF4	Q16769	Q01432	P0DOX7		Q9UJ70
	668						O95721	P56524	O95969	P01594		Q15631
	669						O60749	Q15814	Q12904	A0A0C4DH72		P29218
	670						P00441	P53396	Q15631	A0A0C4DH67		O43488
	671						P08294	P01133	P53621	P01601		Q9H444
	672						P04179	O75506	O00592	A0A0C4DH68		P22061
	673						Q99523	O95969	Q9UBQ5	P06310		Q16543
	674						P29508	Q96JY6	P08581	P01624		P08185
	675						P36952	P06132	Q9Y2V2	A0A0C4DH25		P40306
	676						P35237	Q5TDP6	Q8WXI7	P0DOY2		O95445
	677						P50452	Q9BVG4	Q99598	A0A0B4J1U3		Q99733
	678						O43278	Q9UK22	Q6ZQR2	P01703		P13716
	679						P22528	P05878	P01861	P01700		Q9BUT1
	680						P35326	Q9Y230	Q96PD5	P01701		P68366
	681						P35270	P54802	O95436	P01706		P61247
	682						Q14515	Q14019	P18074	A0A075B6J9		P52788
	683						Q9UBC9	Q9NXA8	Q6ZMV7	P01709		P31948
	684						Q01082	O43252	P14324	P80748		P61978
	685						Q9Y6N5	P25815	P49721	A0A075B6I0		P18124
	686						Q14247	Q9HD33	P01031	A0A0B4J1Y8		Q9UBG3
	687						Q07955	P00387	P51160	O00629		P22234
	688						Q8TE77	Q16186	Q15058	O15131		P07910
	689						Q9Y365	P42166	Q15366	Q14974		O94760
	690						P42224	Q99447	P01706	Q8TEX9		Q9Y3I0
	691						P40763	P52434	P57735	O00410		O75396
	692						P31948	Q9UJC5	Q8IX01	O95373		O75223
	693						Q9NZ72	Q12765	Q9NQ48	Q96P70		P51149
	694						P27105	P0DSZ7	Q14697	O14920		Q8N1Q1
	695						Q13277	P0DSZ8	P33241	Q9H2U2		P21399
	696						O15400	P31277	P12956	Q15181		Q15185
	697						Q9UH65	Q5KU26	P06748	P12268		P27824
	698						P14868	Q2TAY7	P54136	Q6PFW1		Q9Y678
	699						P07814	Q96MF2	Q9BPX5	P29218		P09417
	700						O43776	P62277	Q9NV39	P49441		O75131
	701						Q16563	Q9BT09	Q9UPX6	Q9NPH2		Q9UM54
	702						P54136	Q6UXQ8	P18283	P14735		P35998
	703						P26640	Q9H5X1	Q86WI3	P18065		Q96FW1
	704						P23381	O75170	P29508	P17936		O60784
	705						P54577	Q8IYK8		P24592		P47755
	706						P09758	P61077		P35858		P05141
	707						P37837	Q14376		P19827		P62942
	708						P68363	O43493		P19823		Q8NFU3
	709						P68371	Q8NFQ6		Q06033		P15880
	710						O75347			Q14624		P04114
	711						Q99426			O14896		P01040
	712						P20061			P20591		P62249
	713						P53999			O14879		Q96C19
	714						P17987			Q96AZ6		P24534
	715						P78371			P18510		P31153
	716						P50991			Q9NWZ3		P55011
	717						P48643			Q14116		P29466
	718						P49368			P07476		Q14847
	719						P50990			Q96CN7		P46782
	720						P40227			O75874		P62888
	721						P55072			Q13907		Q99829
	722						P04155			P0C870		P00918
	723						P21980			P14923		Q96BQ1
	724						P05543			Q9H910		P00739
	725						P10599			P29622		P31150
	726						P00734			Q5T749		P40939
	727						Q9NQ88			Q14894		P07358
	728						Q9Y490			Q9NSK0		Q99933
	729						O60603			P33176		P08294
	730						Q9Y2S6			Q9NQT8		P62906
	731						Q9BVK6			Q7Z4S6		Q9NZ01
	732						P49755			P01042		A0A0C4DH32
	733						Q9NYL9			O43278		P04179
	734						Q03169			Q16719		P00387
	735						P50591			Q08431		P0DP09
	736						Q9H0E2			P22079		Q03591
	737						Q15785			P02788		Q92882
	738						P60174			Q04760		O95782
	739						Q9H3S4			Q9Y2S2		Q9NUQ9
	740						P67936			O43813		P28062
	741						O14773			Q6PKG0		Q8IWE2
	742						O43617			Q14766		P61088
	743						Q9BW30			Q9BS40		P61224
	744						Q99598			Q99538		Q96FV2
	745						Q8NFU3			Q9UIC8		P46776
	746						O14907			P02750		O75368
	747						Q9BRA2			Q32MZ4		P55957
	748						Q8NBS9			Q8N1G4		Q9P1F3
	749						P63313			P30740		P62917
	750						P19971			P09960		P61923
	751						P68036			Q8N0W3		P46926
	752						Q15819			Q14847		P62851
	753						P22314			Q9UHB6		Q9Y224
	754						Q8TBC4			Q8WWI1		P62280
	755						P41226			Q13449		P62857
	756						P61081			P31025		P51148
	757						P61086			Q86X29		P46976
	758						P15374			Q93052		P02655
	759						P0C7P4			P50851		Q13561
	760						O60701			Q9P260		Q15019
	761						Q16851			P00338		Q07960
	762						P11172			P07195		P07360
	763						B0FP48			P24666		P55327
	764						O60763			P51884		Q9H361
	765						Q15904			Q7Z4W1		P35606
	766						Q99536			P33241		P62701
	767						P38606			Q15046		Q8TCD5
	768						P21281			Q5VWZ2		P46439
	769						P21283			P38571		Q14002
	770						O75348			P10253		P02746
	771						P15498			P61626		P61019
	772						P08670			P40121		P49720
	773						O00534			Q14764		P55036
	774						Q7Z5L0			P40925		P43652
	775						Q9H9H4			O43708		Q07812
	776						Q9BRG1			Q9ULC4		O60256
	777						Q96QK1			O75556		P61077
	778						O75351			Q96IJ6		O60925
	779						P04004			Q9Y5P6		P15374
	780						Q14508			P34949		P45880
	781						P47989			P33908		P00505
	782						P12956			Q9H8J5		P09455
	783						P16989			P09237		P51858
	784						Q8N7P7			P08582		O75367
	785						P25311			Q13421		P14868
	786						Q96DA0			P01033		P30084
	787						Q15942			Q9NZL9		P04066
	788						P31946			P53582		P49913
	789						P62258			Q9BQA1		Q9NZN3
	790						Q04917			Q9BV20		P49419
	791						P61981			Q03426		P26038
	792						P31947			Q15691		P28482
	793						P27348			Q9UJ68		O95394
	794						P63104			P28482		O15305
	795						P01889			O15264		P13671
	796						P01911			Q16539		P0DMN0
	797						P52209			P27361		P33241
	798						O95336			Q96T76		P29373
	799									P08571		Q13813
	800									Q15796		P23396
	801									P15941		O15264
	802									Q8WXI7		P17174
	803									Q99102		P62750
	804									P98088		Q9UNZ2
	805									Q96DR8		P62913
	806									P22234		P62081
	807									P02144		P07357
	808									P60660		Q8TAX9
	809									O14950		Q9P2T1
	810									Q7Z406		Q00169
	811									P35579		P07305
	812									P58546		O60749
	813									O94760		Q15121
	814									O95865		P02794
	815									O14745		P08708
	816									Q9UJ70		P05388
	817									Q86SF2		Q15149
	818									Q9Y2A9		Q92688
	819									Q96PD5		P62269
	820									O95671		Q00325
	821									P15559		P49588
	822									Q8NCW5		Q9NQR4
	823									Q6BCY4		O15511
	824									P00387		Q6UXK2
	825									P48163		Q13618
	826									Q9BXJ9		P55209
	827									O43847		Q5SSJ5
	828									E9PAV3		P50914
	829									Q9Y2A7		Q14116
	830									Q9Y5A7		O00571
	831									Q8TBC4		Q9Y5Y2
	832									Q13564		P55263
	833									P61081		P07476
	834									O00533		Q96C23
	835									Q6ZNJ1		P51572
	836									Q09666		Q99961
	837									Q99574		Q96MM6
	838									Q14697		Q16864
	839									P59665		P48594
	840									P80188		P06753
	841									Q8NBF2		O75608
	842									Q96TA1		P33176
	843									P43490		Q9HB07
	844									Q9NWW6		P47929
	845									Q6XQN6		P49411
	846									Q9GZT8		P30711
	847									Q9UNZ2		P61457
	848									Q00653		P25325
	849									P19838		P07099
	850									Q8TAT6		P01911
	851									P61970		Q562R1
	852									P67809		P63208
	853									Q02818		Q92499
	854									P80303		Q9Y315
	855									O60936		P68032
	856									P19338		Q9Y5P6
	857									Q6DKJ4		P01834
	858									Q13232		O94979
	859									P22392		P52943
	860									P55209		P49407
	861									Q99733		P06748
	862									Q9H173		P00748
	863									Q9NTK5		P05198
	864									Q9Y3B8		P0DME0
	865									Q9NQR4		O00487
	866									Q99935		O00757
	867									Q92882		Q9UNH7
	868									Q86UD1		O60936
	869									Q8N573		P27635
	870									P22059		Q16531
	871									Q9BXW6		Q9NRV9
	872									P50897		P02814
	873									Q9NVE7		P15121
	874									O00151		Q15056
	875									Q96HC4		P36507
	876									O14908		Q13790
	877									P19021		O15212
	878									P62937		Q99584
	879									P23284		Q96NY7
	880									P62942		P19338
	881									Q00688		P53618
	882									Q02790		P10155
	883									Q9Y3C6		Q9ULZ3
	884									O60664		Q9UHY7
	885									O60437		P35219
	886									Q06830		P68431
	887									P32119		P61026
	888									Q13162		P18085
	889									P30044		P57735
	890									P30041		P63173
	891									Q9NSD9		Q15437
	892									P30086		P23246
	893									Q96S96		Q04609
	894									Q8TBX8		Q13200
	895									Q00169		Q86SF2
	896									P48739		O00232
	897									P80108		P48047
	898									O95394		O00410
	899									Q6VY07		P51452
	900									P36871		O43490
	901									Q96G03		Q9Y285
	902									P00558		Q96P63
	903									P18669		Q9UK22
	904									P14555		Q53RT3
	905									Q9Y263		P35270
	906									P36969		Q9NTK5
	907									P55058		Q9HCY8
	908									Q9H008		Q9BPX5
	909									O15305		P62829
	910									Q9HAB8		P28072
	911									Q14558		P18827
	912									Q9Y617		P17900
	913									Q96BW5		P05204
	914									Q5SRE7		Q9Y2B0
	915									P36955		Q8NDH3
	916									Q9GZP4		Q6UW68
	917									P03952		P49908
	918									P05155		P46783
	919									P05154		P18440
	920									Q8NC51		P12724
	921									P05120		O75915
	922									P00747		Q9Y6R1
	923									Q14651		Q96IJ6
	924									P13796		P83731
	925									P13797		P62314
	926									P43034		P58499
	927									Q9NRA1		P02144
	928									Q9NX46		O95379
	929									Q15365		P35080
	930									Q15366		P05386
	931									P11940		O14684
	932									Q9H074		P36578
	933									P01833		P00367
	934									Q8NCL4		P07948
	935									P26599		Q05655
	936									O60925		Q9UHJ6
	937									Q9UHV9		P13861
	938									P61758		Q9UHB6
	939									Q9NQP4		Q02487
	940									Q99471		P54727
	941									Q8NDH3		Q9Y371
	942									O95786		P20674
	943									P26196		P12081
	944									O76071		Q8NBS9
	945									Q5GLZ8		A0A0B4J1X8
	946									Q93008		Q7Z6Z7
	947									P09668		Q8WXG9
	948									Q15113		O43813
	949									Q02809		Q9Y3C8
	950									P01133		P00492
	951									P07737		Q9UNM6
	952									Q8WUM4		Q9BVK6
	953									Q9BUL8		Q13765
	954									Q53EL6		P61254
	955									O14737		Q9Y6N5
	956									O75340		Q8N1G4
	957									P12273		P63151
	958									Q9UQ80		O00194
	959									Q6MZM9		P62318
	960									Q16378		O43708
	961									P48147		Q96L46
	962									O43490		O14879
	963									P07602		P22792
	964									Q15185		Q5SRE7
	965									Q14914		Q9C002
	966									P41222		P68402
	967									Q16651		Q9UMY4
	968									O43653		Q7KZF4
	969									P15309		Q9BUL8
	970									Q16186		Q8NI22
	971									Q06323		O75340
	972									Q9UL46		P12814
	973									P25786		Q03252
	974									P25787		Q9NZL9
	975									P25788		P48739
	976									P25789		Q7Z7M9
	977									P28066		Q5TDH0
	978									P60900		P61313
	979									O14818		Q15369
	980									P20618		Q9Y230
	981									P49721		P01031
	982									P49720		Q6GMV3
	983									P28070		O95433
	984									P28072		P05161
	985									P28062		P08134
	986									P28065		O14791
	987									Q96IU4		P09871
	988									Q8IVF2		O00303
	989									P02760		P46937
	990									Q9UKY7		Q9H2G2
	991									O60888		Q9H788
	992									Q5TDH0		Q9UHB9
	993									O60610		O14964
	994									O60879		Q14203
	995									P30101
	996									P13667
	997									P07237
	998									P49257
	999									P58499
	1000									Q96BQ1
	1001									Q9NUQ9
	1002									P49356
	1003									P49354
	1004									Q13045
	1005									Q9UNF0
	1006									Q05655
	1007									Q8WZA0
	1008									Q92597
	1009									Q9UN36
	1010									Q9BZQ8
	1011									Q8IWE2
	1012									O60502
	1013									Q9BVG4
	1014									O60927
	1015									Q15435
	1016									P35813
	1017									Q5SGD2
	1018									Q9Y570
	1019									Q8TE77
	1020									P31949
	1021									Q99584
	1022									Q96FQ6
	1023									P26447
	1024									P06703
	1025									P31151
	1026									P05109
	1027									P06702
	1028									P25815
	1029									P0DME0
	1030									Q92734
	1031									Q15437
	1032									P53992
	1033									O94979
	1034									Q99497
	1035									P21980
	1036									P22061
	1037									Q13882
	1038									P00734
	1039									P15498
	1040									Q08623
	1041									P61457
	1042									P00491
	1043									P55786
	1044									O75884
	1045									Q6GMV3
	1046									Q9HBR0
	1047									O00764
	1048									O94903
	1049									Q6P996
	1050									Q9NVS9
	1051									P14618
	1052									Q5T6V5
	1053									Q08257
	1054									Q53FA7
	1055									P31150
	1056									P50395
	1057									Q9Y3P9
	1058									Q9P2R3
	1059									P31749
	1060									P52306
	1061									P46940
	1062									O95294
	1063									P63000
	1064									P60763
	1065									P61026
	1066									Q15907
	1067									P61106
	1068									Q9NP72
	1069									P61019
	1070									P61020
	1071									P20340
	1072									P51149
	1073									P62834
	1074									P63244
	1075									P10586
	1076									Q92900
	1077									Q8WUF5
	1078									Q15293
	1079									P00352
	1080									P49788
	1081									Q9HB40
	1082									P09455
	1083									P02753
	1084									P52565
	1085									P52566
	1086									Q07960
	1087									P34096
	1088									P13489
	1089									O00584
	1090									P49247
	1091									P11908
	1092									Q15418
	1093									P51812
	1094									P16083
	1095									Q9Y265
	1096									O43865
	1097									P31153
	1098									O95171
	1099									Q12765
	1100									Q96FV2
	1101									Q8N474
	1102									O95968
	1103									O95969
	1104									Q13228
	1105									P35270
	1106									Q15019
	1107									Q14141
	1108									Q16181
	1109									Q9UHD8
	1110									Q13501
	1111									P34896
	1112									Q92743
	1113									Q9Y6E0
	1114									Q9P289
	1115									Q15208
	1116									Q7KZI7
	1117									Q8TD19
	1118									O95747
	1119									Q13177
	1120									Q9H2K8
	1121									Q9Y3S1
	1122									P63151
	1123									Q14738
	1124									P30153
	1125									Q15257
	1126									P67775
	1127									P62714
	1128									P53041
	1129									O00743
	1130									Q9UPN7
	1131									Q5H9R7
	1132									Q9BRF8
	1133									P62140
	1134									Q9Y3F4
	1135									P49591
	1136									P02787
	1137									P29508
	1138									P36952
	1139									P35237
	1140									P02768
	1141									P02743
	1142									P27169
	1143									P10768
	1144									Q9H788
	1145									O75368
	1146									A0MZ66
	1147									Q9NR45
	1148									P42224
	1149									P52630
	1150									P40763
	1151									P42226
	1152									O43765
	1153									P62318
	1154									P35326
	1155									Q9UBC9
	1156									Q13126
	1157									Q8WVQ1
	1158									Q00796
	1159									Q13596
	1160									O60749
	1161									Q9Y5X3
	1162									Q9UNH7
	1163									Q14515
	1164									Q9BW04
	1165									Q13813
	1166									P63208
	1167									Q13838
	1168									Q14247
	1169									Q7KZF4
	1170									Q9Y365
	1171									Q9UEW8
	1172									Q9H2G2
	1173									P31948
	1174									Q99954
	1175									P02814
	1176									Q8NBJ7
	1177									O00391
	1178									P0DMM9
	1179									O00204
	1180									P63279
	1181									P00441
	1182									Q9UH65
	1183									Q9NPQ8
	1184									Q15833
	1185									Q9Y490
	1186									O60784
	1187									P17987
	1188									P78371
	1189									P50991
	1190									P48643
	1191									Q99832
	1192									P49368
	1193									P50990
	1194									P40227
	1195									Q9UGI8
	1196									P05452
	1197									Q6PGP7
	1198									Q5R3I4
	1199									P52888
	1200									P51580
	1201									Q9BRA2
	1202									Q8NBS9
	1203									P10599
	1204									Q16881
	1205									O43396
	1206									Q8NFU3
	1207									P26639
	1208									P07996
	1209									Q9NXG2
	1210									Q9BV44
	1211									P19971
	1212									P05543
	1213									Q9UDY2
	1214									O75663
	1215									P04066
	1216									Q9H0E2
	1217									P37837
	1218									P20061
	1219									Q00577
	1220									P46937
	1221									O95359
	1222									Q15582
	1223									P61586
	1224									P37802
	1225									P55072
	1226									P29401
	1227									P13693
	1228									Q15631
	1229									Q99598
	1230									Q5TGY1
	1231									Q92973
	1232									P02766
	1233									P04155
	1234									P22102
	1235									Q3LXA3
	1236									P60174
	1237									O95361
	1238									Q14134
	1239									O14773
	1240									P29144
	1241									Q9Y3I0
	1242									Q9NYL9
	1243									P06753
	1244									P67936
	1245									P23381
	1246									Q9BQE3
	1247									P68366
	1248									P07437
	1249									Q9BVA1
	1250									P68371
	1251									Q9BUF5
	1252									O94811
	1253									Q99426
	1254									O75347
	1255									Q9BTW9
	1256									Q14166
	1257									Q9GZM7
	1258									Q9NS68
	1259									P55327
	1260									P09758
	1261									Q12792
	1262									Q6IBS0
	1263									O15327
	1264									P41240
	1265									Q06124
	1266									Q12923
	1267									Q9H3S7
	1268									P54577
	1269									P54578
	1270									Q9Y4E8
	1271									Q9UPU5
	1272									Q96K76
	1273									P45974
	1274									P15374
	1275									Q9Y5K5
	1276									Q96FW1
	1277									O14933
	1278									P62979
	1279									P61086
	1280									P68036
	1281									P61088
	1282									Q13404
	1283									Q15819
	1284									Q9Y3C8
	1285									P22314
	1286									A0AVT1
	1287									P41226
	1288									O95352
	1289									Q9NT62
	1290									Q04323
	1291									Q14376
	1292									O60701
	1293									Q16222
	1294									P30085
	1295									Q6NV74
	1296									Q9ULV0
	1297									Q9UM54
	1298									Q9HB07
	1299									Q9NWV4
	1300									P11172
	1301									Q16851
	1302									P54727
	1303									O75436
	1304									Q9UBQ0
	1305									Q96QK1
	1306									O75351
	1307									Q9BRG1
	1308									Q86VN1
	1309									Q96H20
	1310									P26640
	1311									P50552
	1312									P46459
	1313									P08670
	1314									P18206
	1315									P02774
	1316									P07225
	1317									P04004
	1318									Q6PCB0
	1319									O00534
	1320									P38606
	1321									P21281
	1322									Q9Y5K8
	1323									P36543
	1324									O75348
	1325									Q9UI12
	1326									Q15904
	1327									Q14508
	1328									Q8IWB7
	1329									O75083
	1330									Q9H1Z4
	1331									Q9NQW7
	1332									P12955
	1333									P47989
	1334									P13010
	1335									O15231
	1336									P25311
	1337									Q96DA0
